# Supplementary material
Source: Springer Nature journal article supplement (https://www.springermedizin.de/resource/supplementary/12933_2010_291_MOESM2_ESM.pdf/9540032)

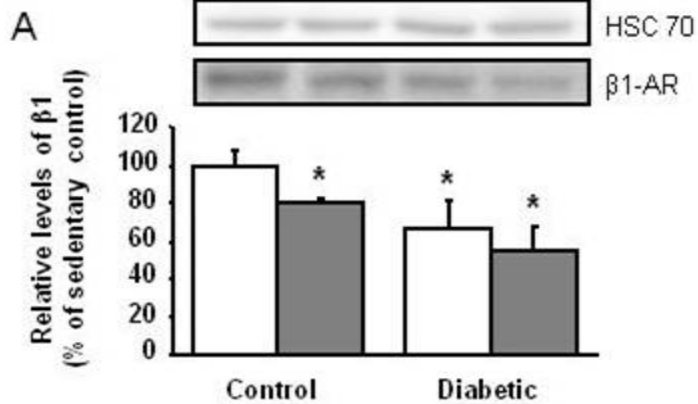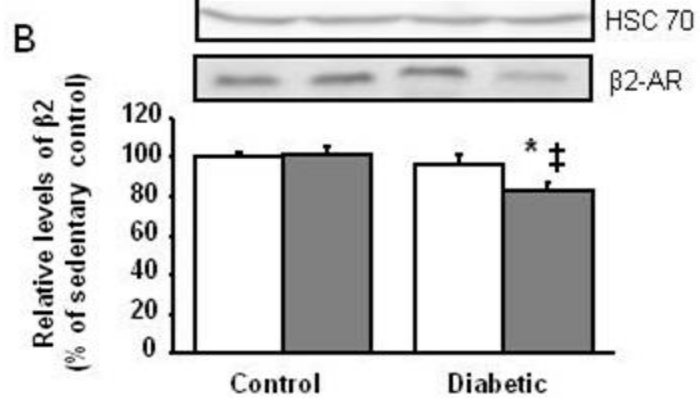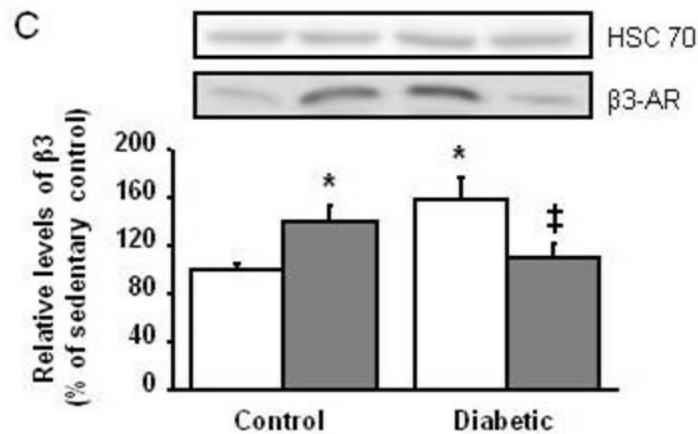

□ Sedentary  
■ Trained

Supplement: MOESM2 [file 9540032]
